# Supplementary material
Source: publisher figshare collection journal article supplement (https://frontiersin.figshare.com/ndownloader/files/20176013)
Supplement: Supplementary file 1 [file 20176013]

**Supplementary material 1**

**Traits and environmental data used for the analyses**

**Table S1**. Facebook pages and groups surveyed in our study.

| **Facebook group/page** | **Web link** |
| --- | --- |
| Mammiferi Italiani - ATIt | https://www.facebook.com/groups/mammiferi |
| EBN ITALIA: il birdwatching italiano | [https://www.facebook.com/groups/30962723492](https://www.facebook.com/groups/30962723492/) |
| Societas Herpetologica Italica | https://www.facebook.com/groups/SocietasHerpetologicaItalica |
| SOS Biodiversità | https://www.facebook.com/sosbiodiversita/ |
| Herping Italia | https://www.facebook.com/groups/herpingitalia |
| Birdwatching and Wildlife | https://www.facebook.com/groups/birdwatchingwild |
| iNaturalist Italia | https://www.facebook.com/groups/1503790319948650 |
| Fauna Siciliana | https://www.facebook.com/groups/faunasiciliana |
| Fauna Toscana | https://www.facebook.com/groups/353545214774192 |
| Educare sulle specie alloctone | https://www.facebook.com/groups/35938806586 |
| Fototrappolaggio naturalistico | https://www.facebook.com/groups/216574218424779 |
| Focusing on Wildlife | https://www.facebook.com/groups/322096484510326 |

**Traits and environmental data used for the analyses**

**Table S2.** Traits used to measure functional diversity (Grimm et al., 2014; Wilman et al., 2014; Trochet et al., 2014).

| **Trait** | **Scale and categories** |
| --- | --- |
| 1. Body mass | Continuous |
| 2. Percent use of: invertebrates | estimated % use |
| 3. Percent use of: mammals and birds | estimated % use |
| 4. Percent use of: reptiles | estimated % use |
| 5. Percent use of: fish | estimated % use |
| 6. Percent use of: vertebrates-general or unknown | estimated % use |
| 7. Percent use of: scavenge, garbage, offal, carcasses, trawlers, carrion | estimated % use |
| 8. Percent use of: fruit, drupes | estimated % use |
| 9. Percent use of: nectar, pollen, plant exudates, gums | estimated % use |
| 10. Percent use of: seed, maize, nuts, spores, wheat, grains | estimated % use |
| 11. Percent use of: other plant material | estimated % use |

**References**

Grimm, A., Ramirez, A.M.P., Moulherat, S., Reynaud, J., and Henle, K. (2014). Life-history database of European reptile species. *Nat. Cons.* 9, 45-67.

Trochet, A., Moulherat, S., Calvez, O., Stevens, V.M., Clobert, J., and Schmeller, D.S. (2014). A database of life-history traits of European amphibians. *Biodiv. Data J.* 2: e4123.

Wilman, H., Belmaker, J., Simpson, J., de la Rosa, C., Rivadeneira, M.M., and Jetz, W. (2014). EltonTraits 1.0: Species-level foraging attributes of the world’s birds and mammals. *Ecology* 95, 2027.

**Other references used for traits of Amphibia and Reptilia**

***Algyroides fitzingeri***

Capula, M., and Luiselli, L. (1994). Resource partitioning in a Mediterranean lizard community. *Ital. J. Zool.* 61, 173-177.

***Anguis veronensis***

Capizzi, D., Anibaldi, C., Rugiero, L., and Luiselli, L. (1998). Competition and morphological similarity: The case of the snake-like lizards *Anguis fragilis* (Anguidae) and *Chalcides chalcides* (Scincidae). *Revue d’ Ecologie, Terre Vie* 53, 211-223.

Guarino, F.M., Aprea, G., Caputo, V., Maio, N., Odierna, G., and Picariello, O. (2012). Atlante degli Anfibi e dei Rettili della Campania. Massa Editore, Napoli, Italy.

***Archaeolacerta bedriagae***

Bruno, S. (1986). Tartarughe e Sauri d’Italia. Giunti Editions, Florence, Italy.

***Bufo balearicus***

Lo Valvo M, Faraone F, Augugliaro C, Lillo F (2009) Differenze intersessuali nella dieta in una popolazione di Rospo smeraldino siciliano *Bufo siculus* (Stock et al., 2008). Congresso della Società Italiana di Erpetologia 19: 117.

Guarino, F.M., Aprea, G., Caputo, V., Maio, N., Odierna, G., and Picariello, O. (2012). Atlante degli Anfibi e dei Rettili della Campania. Massa Editore, Napoli, Italy.

Nicoara, A., Nicoara, M., and Bianchini, F. (2005). Diet composition during breeding period in populations of *Bufo viridis*, *Pelobates fuscus* and *Rana esculenta* complex from Ciric River’s basin (Iaşi. Romania). Analele Ştiinţifice ale Universităţii “Al.I. Cuza” Iaşi, s. Biologie animală 51: 179-87.

***Bufo bufo***

Diaz-Paniagua, C. (1989). Larval diets of two anuran species, *Pelodytes punctatus* and *Bufo bufo*, in SW Spain. *Amphibia-Reptilia* 10, 71-75.

Gittins, S.P. (1987). The diet of the common toad (*Bufo bufo*) around a pond in Mid-Wales. *Amphibia-Reptilia* 8, 13-17.

Guarino, F.M., Aprea, G., Caputo, V., Maio, N., Odierna, G., and Picariello, O. (2012). Atlante degli Anfibi e dei Rettili della Campania. Massa Editore, Napoli, Italy.

***Chalcides chalcides***

Capizzi, D., Anibaldi, C., Rugiero, L., and Luiselli, L. (1998). Competition and morphological similarity: The case of the snake-like lizards *Anguis fragilis* (Anguidae) and *Chalcides chalcides* (Scincidae). *Revue d’ Ecologie, Terre Vie* 53, 211-223.

Guarino, F.M., Aprea, G., Caputo, V., Maio, N., Odierna, G., and Picariello, O. (2012). Atlante degli Anfibi e dei Rettili della Campania. Massa Editore, Napoli, Italy.

***Chalcides ocellatus***

Capula, M., and Luiselli, L. (1994). Resource partitioning in a Mediterranean lizard community. *Ital. J. Zool.* 61, 173-177.

***Coronella austriaca***

Brown, D.S., Ebenezer, K.L., and Symondson WO (2014) Molecular analysis of the diets of snakes: changes in prey exploitation during development of the rare smooth snake *Coronella* *austriaca*. *Molec. Ecol.* 23, 3734-3743.

Guarino, F.M., Aprea, G., Caputo, V., Maio, N., Odierna, G., and Picariello, O. (2012). Atlante degli Anfibi e dei Rettili della Campania. Massa Editore, Napoli, Italy.

***Coronella girondica***

Luiselli, L., Pleguezuelos, J.M., Capula, M., and Villafranca, C. (2001). Geographic variation in the diet composition of a secretive Mediterranean colubrid snake: *Coronella girondica* from Spain and Italy. *Ital. J. Zool.* 68, 57-60.

Guarino, F.M., Aprea, G., Caputo, V., Maio, N., Odierna, G., and Picariello, O. (2012). Atlante degli Anfibi e dei Rettili della Campania. Massa Editore, Napoli, Italy.

***Mediodactylus kotschyi***

Ajtić, R. (2014). Morphological, biogeographical and ecological characteristics of Kotschy’s gecko (*Cyrtodactylus kotschyi* Steindachner, 1870 Gekkonidae) from the mainland portion of its distribution range. *Fauna Balkana* 3, 1-70.

***Elaphe quatuorlineata***

Capizzi, D., and Luiselli, L. (1997). The diet of the four-lined snake (*Elaphe quatuorlineata*) in Mediterranean central Italy. *Herpetological Journal* 7, 1-5.

Capizzi, D., Luiselli, L., Capula, M., and Rugiero, L. (1995). Feeding habits of a Mediterranean community of snakes in relation to prey availability. *Revue d’Ecologie, Terre Vie* 50, 353-363.

***Hemidactylus turcicus***

Saenz, D. (1996). Dietary overview of *Hemidactylus turcicus* with possible implications of food partitioning. *J. Herpetol.* 5, 461-466.

Ibrahim, A.A. (2007). Ecology of the Mediterranean Gecko, *Hemidactylus turcicus* (Linnaeus, 1758) (Reptilia: Gekkonidae), in North Sinai, Egypt. *Zool. Middle East* 41, 41-54.

***Hierophis virdiflavus/carbonarius***

Capizzi, D., Luiselli, L., Capula, M., and Rugiero, L. (1995). Feeding habits of a Mediterranean community of snakes in relation to prey availability. *Revue d’Ecologie, Terre Vie* 50, 353-363.

Capizzi, D., Capula, M., Rugiero, L., and Luiselli, L. (2008). Dietary patterns of two sympatric Mediterranean snakes (*Hierophis viridiflavus* and *Zamenis longissimus*) along a gradient of habitat alteration. *Herp. J.* 18, 141-146.

Guarino, F.M., Aprea, G., Caputo, V., Maio, N., Odierna, G., and Picariello, O. (2012). Atlante degli Anfibi e dei Rettili della Campania. Massa Editore, Napoli, Italy.

***Hyla arborea***

Kovács, É.H., Sas, I., Covaciu-Marcov, S.D., Hartel, T., Cupsa, D., and Groza, M. (2007). Seasonal variation in the diet of a population of *Hyla arborea* from Romania. *Amphibia-Reptilia* 28, 485-491.

Pavignano, I. (1990). Niche overlap in tadpole populations of *Pelobates fuscus insubricus* and *Hyla arborea* at a pond in north western Italy. *Ital. J. Zool.* 57, 83-87.

***Lacerta bilineata***

Angelici, F.M., Luiselli, L., and Rugiero, L. (1997). Food habits of the green lizard, *Lacerta bilineata*, in central Italy and a reliability test of faecal pellet analysis. *Ital. J. Zool.* 64, 267-272.

Guarino, F.M., Aprea, G., Caputo, V., Maio, N., Odierna, G., and Picariello, O. (2012). Atlante degli Anfibi e dei Rettili della Campania. Massa Editore, Napoli, Italy.

***Lacerta viridis***

Bruno, S. (1986). Tartarughe e Sauri d’Italia. Giunti Editions, Florence, Italy.

***Malpolon monspessulanus***

Ottonello, D., Oneto, F., Salvidio, S., and Lamagni, L. (2006). Il colubro lacertino, *Malpolon monspessulanus*, nell’Italia Nord Occidentale: distribuzione, dieta e morfometria. *Atti del Congresso Nazionale della Societas Herpetologica Italica* 6, 173-181.

***Natrix natrix***

Faraone, F.P., Giacalone, G., and Lo Valvo, M. (2010). Dati preliminari sulla biometria, il cromatismo e la dieta di una popolazione di *Natrix natrix* della Sicilia occidentale. *Atti Congresso Nazionale Societas Herpetologica Italica* 8, 247-252.

Guarino, F.M., Aprea, G., Caputo, V., Maio, N., Odierna, G., and Picariello, O. (2012). Atlante degli Anfibi e dei Rettili della Campania. Massa Editore, Napoli, Italy.

***Pelophylax* synklepton *esculentus***

Guarino, F.M., Aprea, G., Caputo, V., Maio, N., Odierna, G., and Picariello, O. (2012). Atlante degli Anfibi e dei Rettili della Campania. Massa Editore, Napoli, Italy.

Nicoara, A., Nicoara, M., and Bianchini, F. (2005). Diet composition during breeding period in populations of *Bufo viridis*, *Pelobates fuscus* and *Rana esculenta* complex from Ciric River’s basin (Iaşi. Romania). Analele Ştiinţifice ale Universităţii “Al.I. Cuza” Iaşi, s. Biologie animală 51: 179-87.

***Podarcis filfolensis***

Bombi, P., Vignoli, L., Scalera, R., and Bologna, M. A. (2005). Food habits of *Podarcis filfolensis* (Reptilia, Lacertidae) on a small Mediterranean island during the dry season. *Amphibia-Reptilia* 26, 412.

***Podarcis siculus***

Avery, R.A. (1978). Activity patterns, thermoregulation and food consumption in two sympatric lizard species (*Podarcis muralis* and *P. sicula*) from central Italy. *J. Anim. Ecol.* 8: 143-158.

Capula, M., Luiselli, L., and Rugiero, L. (1993). Comparative ecology in sympatric *Podarcis muralis* and *P. sicula* (Reptilia: Lacertidae) from the historical centre of Rome: What about competition and niche segregation in an urban habitat? *Ital. J. Zool.* 60, 287-291.

Rugiero, L. (1994). Food habits of the Ruin Lizard, *Podarcis sicula* (Rafinesque-Schmaltz, 1810), from a coastal dune in Central Italy. *Herpetozoa* 7, 71-73.

Zuffi, M.A.L., Casu, V., and Marino, S. (2012). The Italian wall lizard, *Podarcis siculus*, along the Tuscanian coast of central Italy: biometrical features and phenotypic patterns. *Herp. J.* 22, 207-212.

***Podarcis muralis***

Avery, R.A. (1978). Activity patterns, thermoregulation and food consumption in two sympatric lizard species (*Podarcis muralis* and *P. sicula*) from central Italy. *J. Anim. Ecol.* 1: 143-158.

Capula, M., Luiselli, L., and Rugiero, L. (1993). Comparative ecology in sympatric *Podarcis muralis* and *P. sicula* (Reptilia: Lacertidae) from the historical centre of Rome: What about competition and niche segregation in an urban habitat? *Ital. J. Zool.* 60: 287-291.

Martín, J., and López, P. (1999). An experimental test of the costs of antipredatory refuge use in the wall lizard, *Podarcis muralis*. *Oikos* 1, 499-505.

***Podarcis tiliguerta***

Capula, M., and Luiselli, L. (1994). Resource partitioning in a Mediterranean lizard community. *Ital. J. Zool.* 61, 173-177.

***Rana dalmatina***

Aszalós, L., Bogdan, H., Kovács, É.H., and Peter. V.I. (2005). Food composition of two *Rana* species on a forest habitat (Livada Plain, Romania). *N.W. J. Zool*. 1. 25-30

Vignoli, L., Luiselli, L., and Bologna, M.A. (2009). Dietary patterns and overlap in an Amphibian assemblage at a pond in Mediterranean Central Italy. *Vie et Milieu – Life and Envirnonment* 59, 47-57.

***Rana italica***

Vanni, S., and Nistri, A. (2006). Atlante degli Anfibi e dei Rettili della Toscana. Museo di Storia Naturale “La Specola”, Sezione di Zoologia. Direzione generale politiche territoriali e ambientali. Regione Toscana, Firenze, Italy.

***Rana latastei***

Edgar, P., and Bird, D.R. (2005). Action Plan for the Conservation of the Italian Agile Frog (*Rana latastei*) in Europe. Convention on the Conservation of European Wildlife and Natural Habitats, 25th meeting, Strasbourg, France.

Mansi, M. (1992). Remarks about the feeding habits of *Rana latastei* Boul. (Amphibia, Anura) in two protected areas of the Po Valley (northern Italy). In: Korsos Z, Kiss I (Eds.). Proceedings of the 6th Ordinary General Meeting of the Societas Europaea Herpetologica, 19-23 August 1991, Budapest, Hungary. Hungarian Natural History Museum, Budapest: 305-308.

***Salamandra salamandra***

Manenti, R., Morani, G., De Bernardi, F., and Ficetola, G.F. (2013). Growing in the darkness: predation ability and cannibalism in cave-born larvae of fire salamander, *Salamandra salamandra* (Linnaeus, 1758). *Congresso Nazionale della Societas Herpetologica Italica 9*, 197-198.

Bressi, N., Dolce, S., and Stoch, F. (1996). Larval diet of the fire salamander, *Salamandra salamandra salamandra* (Linnaeus, 1758), near Trieste (North-Eastern Italy) (Amphibia, Caudata, Salamandridae). *Atti del Museo Civico di Storia Naturale di Trieste* 47, 275-283.

***Tarentola mauritanica***

Gil, M.J., Guerrero, F., Perez-Mellado, V. (1994). Seasonal variation in diet composition and prey selection in the Mediterranean gecko *Tarentola mauritanica*. *Isr. J. Zool.* 40, 61-74.

Faraone, F.P., Alessandro, B., and Lo Valvo, M. (2017). Spettro trofico di due popolazioni sinantropiche di geco comune, *Tarentola mauritanica* (Linnaeus, 1758), in Sicilia sud-occidentale. *Atti del Congresso Nazionale Societas Herpetologica Italica 11*, 171-175.

***Testudo hermanni***

Calzolai, R., and Chelazzi, G. (1991). Habitat use in a central Italy population of *Testudo hermanni* Gmelin (Reptilia Testudinidae). *Ethol. Ecol. Evol.* 3, 153-166.

Del Vecchio, S., Burke, R.L., Rugiero, L., Capula, M., and Luiselli, L. (2011). Seasonal changes in the diet of *Testudo hermanni hermanni* in Central Italy. *Herpetologica* 67, 236-249.

***Triturus carnifex***

Joly, P., and Giacoma, C. (1992). Limitation of similarity and feeding habits in three syntopic species of newts (*Triturus*, Amphibia). *Ecogr*. 15, 401-411.

***Vipera aspis***

Capizzi, D., Luiselli, L., Capula, M., and Rugiero, L. (1995). Feeding habits of a Mediterranean community of snakes in relation to prey availability. *Revue d’Ecologie, Terre Vie* 50, 353-363.

Luiselli, L.M., and Agrimi, U. (1991). Composition and variation of the diet of *Vipera aspis francisciredi* in relation to age and reproductive stage. *Amphibia-Reptilia* 12, 137-144.

***Zamenis lineatus***

Capula, M., Luiselli, L., Valenti, S., Ceccarelli, A., Rugiero, L., and Aloise, G. (2006). Are endemic snakes with a narrow distribution more specialist than their wide-ranging counterparts? Evidence from the prey composition and morphometric correlates of the diet in *Zamenis lineatus*, a rat snake endemic to southern Italy. *Amphibia-Reptilia* 27, 531-537.

***Zamenis longissimus***

Capizzi, D., Luiselli, L., Capula, M., and Rugiero, L. (1995). Feeding habits of a Mediterranean community of snakes in relation to prey availability. *Revue d’Ecologie, Terre Vie* 50, 353-363.

Capizzi, D., Capula, M., Rugiero, L., and Luiselli, L. (2008). Dietary patterns of two sympatric Mediterranean snakes (*Hierophis viridiflavus* and *Zamenis longissimus*) along a gradient of habitat alteration. *Herp. J.* 18, 141-146.
